# Supplementary material
Source: HighWire-hosted journal article supplement (https://www.cmajopen.ca/highwire/filestream/80927/field_highwire_adjunct_files/0/open-2016-0008-1-at.pdf)

**Appendix 1 (as supplied by the authors):** Minimum fibrosis stage required for reimbursement of simeprevir with peginterferon plus ribavirin for treatment of hepatitis C virus infection in Canadian provinces/territories

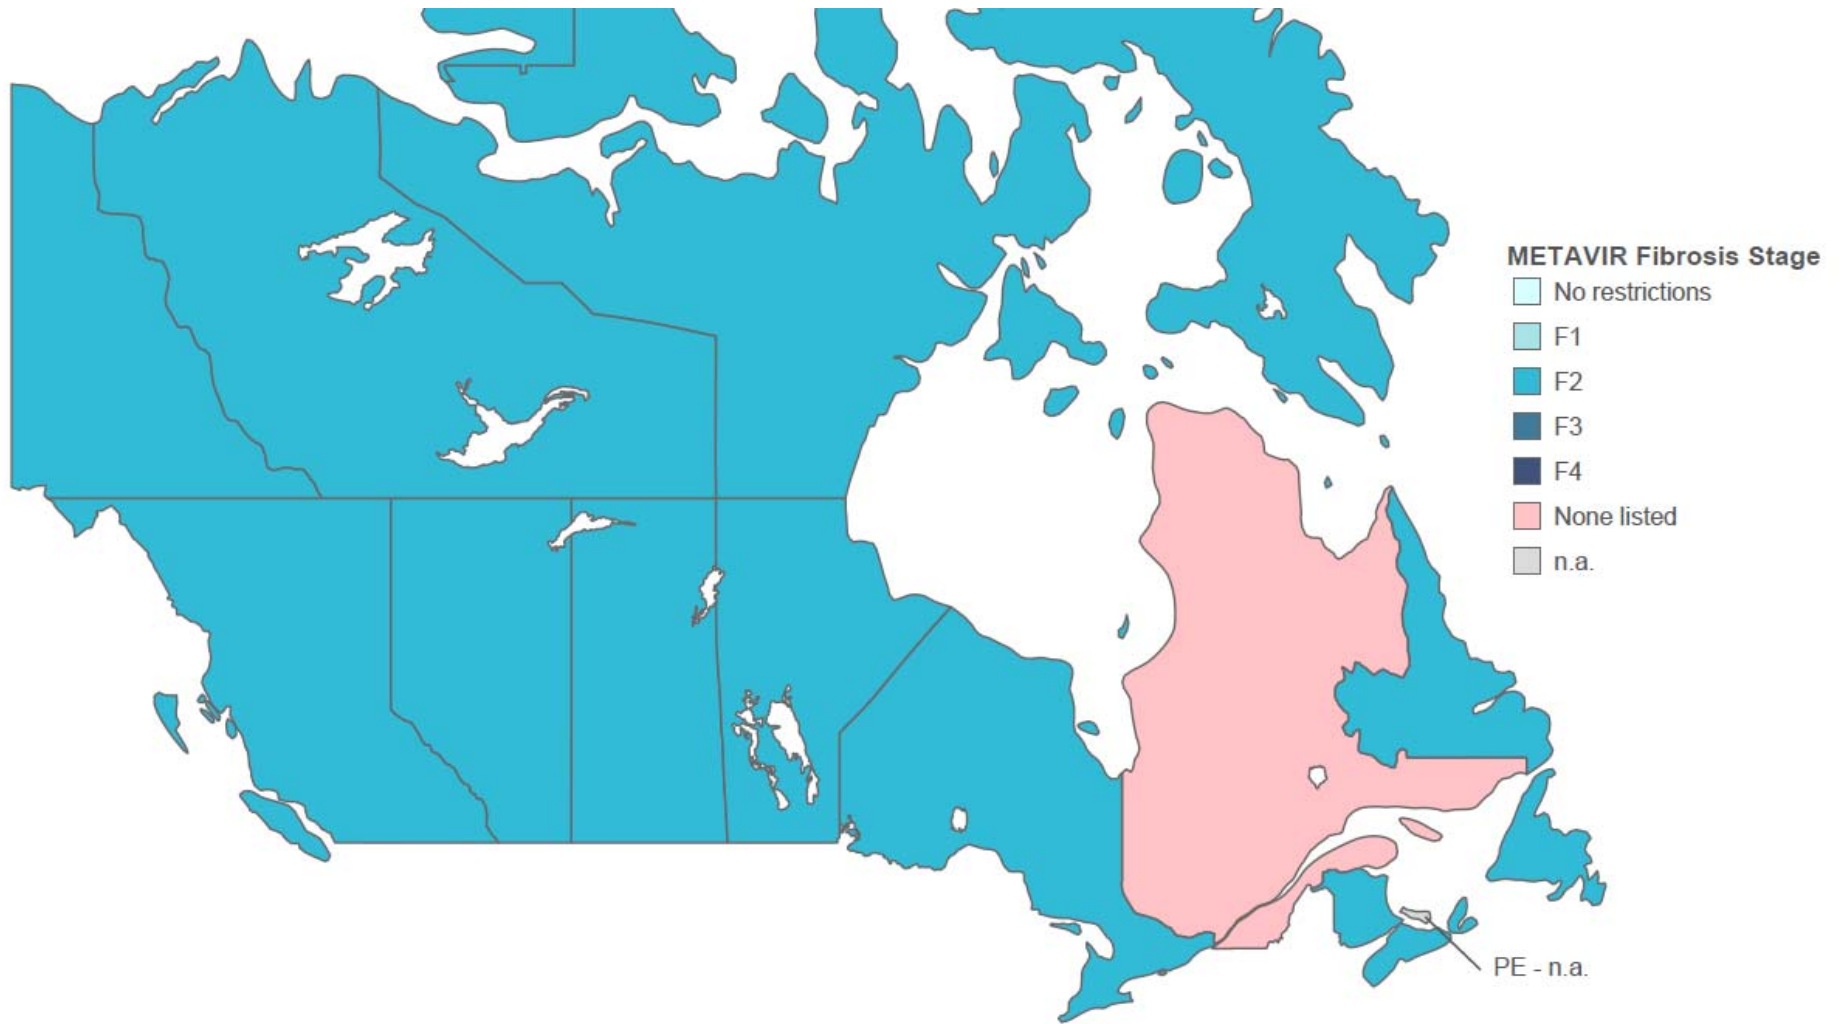

Supplement: open-2016-0008-1-at.pdf [file open-2016-0008-1-at.pdf]
